# Supplementary material for: Treatment consistent with idiopathic multicentric Castleman disease guidelines is associated with improved outcomes
Source: PubMed Central journal article supplement — Blood Adv. 2023 Sep 2;7(21):6652–64. doi: 10.1182/bloodadvances.2023010745 (PMC10637880; doi:10.1182/bloodadvances.2023010745), 2023-09-02
Supplement: BLOODA_ADV-2023-010745-mmc1.pdf [file BLOODA_ADV-2023-010745-mmc1.pdf]

Supplementary Table 1. Adverse Events by Category

|                                                      | Rituximab | Siltuximab | Tocilizumab |
|------------------------------------------------------|-----------|------------|-------------|
| <b>Occurrences of any adverse event</b>              | 83        | 90         | 26          |
| <b>Event Categorization</b>                          |           |            |             |
| Blood and lymphatic system disorders                 | 1 (1.2)   | 3 (3.3)    | 0           |
| Cardiac disorders                                    | 7 (8.4)   | 1 (1.1)    | 1 (3.8)     |
| Ear and labyrinth disorders                          | 0         | 2 (2.2)    | 0           |
| Eye disorders                                        | 1 (1.2)   | 1 (1.1)    | 0           |
| Gastrointestinal disorders                           | 8 (9.6)   | 16 (17.8)  | 6 (23.1)    |
| General disorders and administration site conditions | 12 (14.5) | 9 (10.0)   | 2 (7.7)     |
| Immune system disorders                              | 2 (2.4)   | 2 (2.2)    | 4 (15.4)    |
| Investigations                                       | 0         | 6 (6.7)    | 0           |
| Musculoskeletal and connective tissue disorders      | 20 (24.1) | 9 (10.0)   | 0           |
| Nervous system disorders                             | 7 (8.4)   | 10 (11.1)  | 2 (7.7)     |
| Respiratory, thoracic and mediastinal disorders      | 11 (13.3) | 5 (5.6)    | 4 (15.4)    |
| Skin and subcutaneous tissue disorders               | 10 (12.0) | 18 (20.0)  | 5 (19.2)    |
| Vascular disorders                                   | 4 (4.8)   | 8 (8.9)    | 2 (7.7)     |

Supplementary Table 2. Adverse Event Listing

|                                                             | Rituximab | Siltuximab | Tocilizumab |
|-------------------------------------------------------------|-----------|------------|-------------|
| <b>N Patients Treated</b>                                   | 62        | 66         | 34          |
| <b>Total Events</b>                                         | 83        | 90         | 26          |
| <b>Event Category, N</b>                                    |           |            |             |
| <i>Event, N (% of category)</i>                             |           |            |             |
| <b>Blood and lymphatic system disorders</b>                 | <b>1</b>  | <b>3</b>   | <b>0</b>    |
| Anaemia                                                     | 1 (100)   | 0          | 0           |
| Adenopathy                                                  | 0         | 1 (33.3)   | 0           |
| Cytopenia                                                   | 0         | 1 (33.3)   | 0           |
| Thrombocytopenia                                            | 0         | 1 (33.3)   | 0           |
| <b>Cardiac disorders</b>                                    | <b>7</b>  | <b>1</b>   | <b>1</b>    |
| Atrial fibrillation                                         | 1 (14.3)  | 0          | 0           |
| Chest pain                                                  | 3 (42.9)  | 1 (100)    | 0           |
| Chest tightness                                             | 1 (14.3)  | 0          | 0           |
| Tachycardia                                                 | 2 (28.6)  | 0          | 1 (100)     |
| <b>Ear and labyrinth disorders</b>                          | <b>0</b>  | <b>2</b>   | <b>0</b>    |
| Ear ringing                                                 | 0         | 1 (50)     | 0           |
| Tinnitus                                                    | 0         | 1 (50)     | 0           |
| <b>Eye disorders</b>                                        | <b>1</b>  | <b>1</b>   | <b>0</b>    |
| Vision blurred                                              | 1 (100)   | 0          | 0           |
| Eye irritation                                              | 0         | 1 (100)    | 0           |
| <b>Gastrointestinal disorders</b>                           | <b>8</b>  | <b>16</b>  | <b>6</b>    |
| Abdominal distension                                        | 0         | 0          | 1 (16.7)    |
| Abdominal pain                                              | 1 (12.5)  | 2 (12.5)   | 0           |
| Bad taste                                                   | 1 (12.5)  | 1 (6.3)    | 0           |
| Constipation                                                | 0         | 0          | 1 (16.7)    |
| Diarrhea                                                    | 2 (25)    | 5 (31.3)   | 2 (33.3)    |
| Nausea                                                      | 2 (25)    | 6 (37.5)   | 0           |
| Nausea and vomiting                                         | 1 (12.5)  | 1 (6.3)    | 1 (16.7)    |
| Swallowing difficult                                        | 1 (12.5)  | 0          | 0           |
| Vomiting                                                    | 0         | 1 (6.3)    | 1 (16.7)    |
| <b>General disorders and administration site conditions</b> | <b>12</b> | <b>9</b>   | <b>2</b>    |
| Edema                                                       | 2 (16.7)  | 2 (22.2)   | 0           |
| Fatigue                                                     | 4 (33.3)  | 5 (55.6)   | 1 (50)      |
| Fever                                                       | 2 (16.7)  | 0          | 1 (50)      |
| Infusion related reaction                                   | 3 (33.3)  | 1 (11.1)   | 0           |
| Pain                                                        | 1 (8.3)   | 0          | 0           |
| Swelling                                                    | 0         | 1 (11.1)   | 0           |
| <b>Immune system disorders</b>                              | <b>2</b>  | <b>2</b>   | <b>4</b>    |
| Anaphylactic reaction                                       | 0         | 0          | 4 (100)     |
| DRESS syndrome                                              | 0         | 1 (50)     | 0           |
| Hypogammaglobulinemia                                       | 1 (50)    | 0          | 0           |
| Pemphigus                                                   | 1 (50)    | 0          | 0           |
| Stevens Johnson type reaction                               | 0         | 1 (50)     | 0           |
| <b>Investigations</b>                                       | <b>0</b>  | <b>6</b>   | <b>0</b>    |
| Bilirubin elevated                                          | 0         | 1 (16.7)   | 0           |
| Human anti-mouse antibody positive                          | 0         | 1 (16.7)   | 0           |

|                                                        |           |           |          |
|--------------------------------------------------------|-----------|-----------|----------|
| Weight increased                                       | 0         | 4 (66.7)  | 0        |
| <b>Musculoskeletal and connective tissue disorders</b> | <b>20</b> | <b>9</b>  | <b>0</b> |
| Arthralgia                                             | 1 (5)     | 2 (22.2)  | 0        |
| Back pain                                              | 2 (10)    | 1 (11.1)  | 0        |
| Bone pain                                              | 1 (5)     | 1 (11.1)  | 0        |
| Chills                                                 | 6 (30)    | 0         | 0        |
| Myalgia                                                | 0         | 2 (22.2)  | 0        |
| Pain in extremity                                      | 1 (5)     | 3 (33.3)  | 0        |
| Restless legs                                          | 1 (5)     | 0         | 0        |
| Rigors                                                 | 8 (40)    | 0         | 0        |
| <b>Nervous system disorders</b>                        | <b>7</b>  | <b>10</b> | <b>2</b> |
| Headache                                               | 4 (57.1)  | 6 (60)    | 2 (100)  |
| Neuropathy                                             | 1 (14.3)  | 2 (20)    | 0        |
| Numbness                                               | 0         | 1 (10)    | 0        |
| Shakiness                                              | 1 (14.3)  | 0         | 0        |
| Slurred speech                                         | 0         | 1 (10)    | 0        |
| Tingling                                               | 1 (14.3)  | 0         | 0        |
| <b>Respiratory, thoracic and mediastinal disorders</b> | <b>11</b> | <b>5</b>  | <b>4</b> |
| Chest heaviness                                        |           | 1 (20)    | 0        |
| Constriction throat                                    | 1 (9.1)   | 0         | 1 (25)   |
| Cough                                                  | 2 (18.2)  | 0         | 0        |
| Difficulty breathing                                   | 1 (9.1)   | 0         | 0        |
| Hypoxemia                                              | 0         | 0         | 1 (25)   |
| Itchy throat                                           | 2 (18.2)  | 0         | 1 (25)   |
| Restrictive pulmonary disease                          | 1 (9.1)   | 0         | 0        |
| Shortness of breath                                    | 2 (18.2)  | 2 (40)    | 0        |
| Sinus pain                                             | 0         | 1 (20)    | 0        |
| Sore throat                                            | 0         | 1 (20)    | 0        |
| Stridor                                                | 1 (9.1)   | 0         | 0        |
| Tachypnea                                              | 1 (9.1)   | 0         | 1 (25)   |
| <b>Skin and subcutaneous tissue disorders</b>          | <b>10</b> | <b>18</b> | <b>5</b> |
| Dermatitis                                             | 0         | 0         | 1 (20)   |
| Diaphoresis                                            | 0         | 1 (5.6)   | 0        |
| Facial swelling                                        | 2 (20)    | 0         | 1 (20)   |
| Hidradenitis                                           | 0         | 1 (5.6)   | 0        |
| Itching                                                | 2 (20)    | 1 (5.6)   | 0        |
| Pruritus generalized                                   | 0         | 0         | 1 (20)   |
| Rash                                                   | 3 (30)    | 9 (50)    | 2 (40)   |
| Rash generalized                                       | 1 (10)    | 0         | 0        |
| Rash maculo-papular                                    | 0         | 1 (5.6)   | 0        |
| Rash pruritic                                          | 1 (10)    | 2 (11.1)  | 0        |
| Skin hyperpigmentation                                 | 0         | 1 (5.6)   | 0        |
| Sunburn                                                | 0         | 1 (5.6)   | 0        |
| Urticaria                                              | 1 (10)    | 1 (5.6)   | 0        |
| <b>Vascular disorders</b>                              | <b>4</b>  | <b>8</b>  | <b>2</b> |
| Dizziness                                              | 1 (25)    | 0         | 0        |
| Flash hot                                              | 0         | 2 (25)    | 0        |
| Flushing                                               | 2 (50)    | 2 (25)    | 0        |
| Hypertension                                           | 1 (25)    | 2 (25)    | 0        |
| Hypotension                                            | 0         | 1 (12.5)  | 2 (100)  |
| Lightheadedness                                        | 0         | 1 (12.5)  | 0        |

Supplementary Table 3. Listing of All unique combinations of treatments (regimens)

| Unique combination                                                                                                             | N times administered | Regimen Category                  |
|--------------------------------------------------------------------------------------------------------------------------------|----------------------|-----------------------------------|
| Corticosteroid                                                                                                                 | 51                   | Corticosteroids                   |
| Corticosteroid+Siltuximab                                                                                                      | 40                   | Siltuximab +/- Corticosteroids    |
| Siltuximab                                                                                                                     | 21                   | Siltuximab +/- Corticosteroids    |
| Corticosteroid+Tocilizumab                                                                                                     | 17                   | Tocilizumab +/- Corticosteroids   |
| Tocilizumab                                                                                                                    | 7                    | Tocilizumab +/- Corticosteroids   |
| Corticosteroid+Rituximab                                                                                                       | 22                   | Rituximab +/- Corticosteroids     |
| Rituximab                                                                                                                      | 11                   | Rituximab +/- Corticosteroids     |
| Corticosteroid+Cyclophosphamide+Doxorubicin+Rituximab+Vincristine                                                              | 3                    | Chemotherapy +/- Other treatments |
| Corticosteroid+Cyclophosphamide+Doxorubicin+Vincristine                                                                        | 2                    | Chemotherapy +/- Other treatments |
| Corticosteroid+Etoposide+Immunoglobulin human normal+Rituximab                                                                 | 2                    | Chemotherapy +/- Other treatments |
| Anakinra+Ciclosporin+Corticosteroid+Cyclophosphamide+Immunoglobulin human normal+Rituximab+Siltuximab+Sirolimus+Tocilizumab    | 1                    | Chemotherapy +/- Other treatments |
| Anakinra+Corticosteroid+Eculizumab+Etoposide+Immunoglobulin human normal+Methotrexate                                          | 1                    | Chemotherapy +/- Other treatments |
| Anakinra+Corticosteroid+Etoposide                                                                                              | 1                    | Chemotherapy +/- Other treatments |
| Baricitinib+Bortezomib+Ciclosporin+Corticosteroid+Cyclophosphamide+Immunoglobulin human normal+Rituximab+Siltuximab+Sirolimus  | 1                    | Chemotherapy +/- Other treatments |
| Bendamustine+Corticosteroid+Rituximab                                                                                          | 1                    | Chemotherapy +/- Other treatments |
| Bleomycin+Corticosteroid+Dacarbazine+Doxorubicin+Vinblastine                                                                   | 1                    | Chemotherapy +/- Other treatments |
| Bortezomib+Celecoxib+Corticosteroid+Siltuximab+Thalidomide                                                                     | 1                    | Chemotherapy +/- Other treatments |
| Bortezomib+Ciclosporin+Corticosteroid+Cyclophosphamide+Doxorubicin+Etoposide+Immunoglobulin human normal+Rituximab+Thalidomide | 1                    | Chemotherapy +/- Other treatments |
| Bortezomib+Ciclosporin+Corticosteroid+Immunoglobulin human normal+Siltuximab+Thalidomide                                       | 1                    | Chemotherapy +/- Other treatments |
| Bortezomib+Ciprofloxacin+Corticosteroid+Pentoxifylline+Siltuximab+Thalidomide+Tocilizumab                                      | 1                    | Chemotherapy +/- Other treatments |
| Bortezomib+Cisplatin+Corticosteroid+Cyclophosphamide+Daratumumab+Doxorubicin+Etoposide+Rituximab+Sirolimus+Thalidomide         | 1                    | Chemotherapy +/- Other treatments |
| Bortezomib+Cisplatin+Corticosteroid+Cyclophosphamide+Doxorubicin+Etoposide+Rituximab+Thalidomide+Tocilizumab                   | 1                    | Chemotherapy +/- Other treatments |

|                                                                                                                                                                |   |                                   |
|----------------------------------------------------------------------------------------------------------------------------------------------------------------|---|-----------------------------------|
| Bortezomib+Corticosteroid+Cyclophosphamide+Doxorubicin+Etoposide+Immunoglobulin human normal+Rituximab+Siltuximab+Thalidomide                                  | 1 | Chemotherapy +/- Other treatments |
| Bortezomib+Corticosteroid+Cyclophosphamide+Doxorubicin+Etoposide+Rituximab+Siltuximab+Thalidomide+Tocilizumab                                                  | 1 | Chemotherapy +/- Other treatments |
| Bortezomib+Corticosteroid+Cyclophosphamide+Doxorubicin+Etoposide+Rituximab+Sirolimus                                                                           | 1 | Chemotherapy +/- Other treatments |
| Bortezomib+Corticosteroid+Cyclophosphamide+Doxorubicin+Etoposide+Rituximab+Thalidomide                                                                         | 1 | Chemotherapy +/- Other treatments |
| Bortezomib+Corticosteroid+Cyclophosphamide+Rituximab+Tocilizumab                                                                                               | 1 | Chemotherapy +/- Other treatments |
| Bortezomib+Corticosteroid+Rituximab                                                                                                                            | 1 | Chemotherapy +/- Other treatments |
| Bortezomib+Corticosteroid+Thalidomide+Tocilizumab                                                                                                              | 1 | Chemotherapy +/- Other treatments |
| Ciclosporin+Corticosteroid+Cyclophosphamide+Doxorubicin+Immunoglobulin human normal+Plasmapheresis/plasma exchange+Rituximab+Sirolimus+Tocilizumab+Vincristine | 1 | Chemotherapy +/- Other treatments |
| Ciclosporin+Corticosteroid+Cyclophosphamide+Etoposide+Rituximab+Tocilizumab                                                                                    | 1 | Chemotherapy +/- Other treatments |
| Corticosteroid+Cyclophosphamide                                                                                                                                | 1 | Chemotherapy +/- Other treatments |
| Corticosteroid+Cyclophosphamide+Doxorubicin+Etoposide+Immunoglobulin human normal+Rituximab+Vincristine                                                        | 1 | Chemotherapy +/- Other treatments |
| Corticosteroid+Cyclophosphamide+Doxorubicin+Etoposide+Rituximab+Tocilizumab+Vincristine                                                                        | 1 | Chemotherapy +/- Other treatments |
| Corticosteroid+Cyclophosphamide+Doxorubicin+Hydroxychloroquine phosphate+Vincristine                                                                           | 1 | Chemotherapy +/- Other treatments |
| Corticosteroid+Cyclophosphamide+Doxorubicin+Immunoglobulin human normal+Rituximab+Vincristine                                                                  | 1 | Chemotherapy +/- Other treatments |
| Corticosteroid+Cyclophosphamide+Doxorubicin+Rituximab+Siltuximab+Vincristine                                                                                   | 1 | Chemotherapy +/- Other treatments |
| Corticosteroid+Cyclophosphamide+Doxorubicin+Rituximab+Sirolimus+Tocilizumab+Vincristine                                                                        | 1 | Chemotherapy +/- Other treatments |
| Corticosteroid+Cyclophosphamide+Eculizumab+Immunoglobulin human normal+Rituximab+Siltuximab                                                                    | 1 | Chemotherapy +/- Other treatments |
| Corticosteroid+Cyclophosphamide+Etoposide+Rituximab                                                                                                            | 1 | Chemotherapy +/- Other treatments |
| Corticosteroid+Cyclophosphamide+Etoposide+Rituximab+Tocilizumab                                                                                                | 1 | Chemotherapy +/- Other treatments |
| Corticosteroid+Cyclophosphamide+Etoposide+Rituximab+Vincristine                                                                                                | 1 | Chemotherapy +/- Other treatments |
| Corticosteroid+Cyclophosphamide+Lenalidomide+Thalidomide                                                                                                       | 1 | Chemotherapy +/- Other treatments |
| Corticosteroid+Cyclophosphamide+Rituximab                                                                                                                      | 1 | Chemotherapy +/- Other treatments |
| Corticosteroid+Decitabine+Siltuximab                                                                                                                           | 1 | Chemotherapy +/- Other treatments |

|                                                                              |   |                                        |
|------------------------------------------------------------------------------|---|----------------------------------------|
| Corticosteroid+Etoposide                                                     | 1 | Chemotherapy +/- Other treatments      |
| Corticosteroid+Etoposide+Immunoglobulin human normal+Sirolimus+Tocilizumab   | 1 | Chemotherapy +/- Other treatments      |
| Corticosteroid+Etoposide+Rituximab                                           | 1 | Chemotherapy +/- Other treatments      |
| Cyclophosphamide+Etoposide+Immunoglobulin human normal+Rituximab+Ruxolitinib | 1 | Chemotherapy +/- Other treatments      |
| Cyclophosphamide+Etoposide+Rituximab+Sirolimus                               | 1 | Chemotherapy +/- Other treatments      |
| Decitabine+Rituximab                                                         | 1 | Chemotherapy +/- Other treatments      |
| Decitabine+Siltuximab                                                        | 1 | Chemotherapy +/- Other treatments      |
| Sirolimus                                                                    | 6 | Immunomodulator(s) +/- Corticosteroids |
| Ciclosporin+Corticosteroid                                                   | 3 | Immunomodulator(s) +/- Corticosteroids |
| Corticosteroid+Immunoglobulin human normal                                   | 3 | Immunomodulator(s) +/- Corticosteroids |
| Azathioprine+Corticosteroid                                                  | 2 | Immunomodulator(s) +/- Corticosteroids |
| Anakinra+Corticosteroid                                                      | 1 | Immunomodulator(s) +/- Corticosteroids |
| Anakinra+Corticosteroid+Sirolimus                                            | 1 | Immunomodulator(s) +/- Corticosteroids |
| Ciclosporin+Corticosteroid+Mycophenolate mofetil                             | 1 | Immunomodulator(s) +/- Corticosteroids |
| Corticosteroid+Hydroxychloroquine phosphate                                  | 1 | Immunomodulator(s) +/- Corticosteroids |
| Corticosteroid+Immunoglobulin human normal+Mycophenolate mofetil             | 1 | Immunomodulator(s) +/- Corticosteroids |
| Corticosteroid+Immunoglobulin human normal+Sirolimus                         | 1 | Immunomodulator(s) +/- Corticosteroids |
| Corticosteroid+Immunoglobulin human normal+Thalidomide                       | 1 | Immunomodulator(s) +/- Corticosteroids |
| Corticosteroid+Lenalidomide                                                  | 1 | Immunomodulator(s) +/- Corticosteroids |
| Corticosteroid+Mycophenolate mofetil                                         | 1 | Immunomodulator(s) +/- Corticosteroids |
| Corticosteroid+Sirolimus                                                     | 1 | Immunomodulator(s) +/- Corticosteroids |
| Corticosteroid+Thalidomide                                                   | 1 | Immunomodulator(s) +/- Corticosteroids |
| Eculizumab                                                                   | 1 | Immunomodulator(s) +/- Corticosteroids |
| Hydroxychloroquine phosphate                                                 | 1 | Immunomodulator(s) +/- Corticosteroids |
| Immunoglobulin human normal                                                  | 1 | Immunomodulator(s) +/- Corticosteroids |
| Immunoglobulin human normal+Sirolimus                                        | 1 | Immunomodulator(s) +/- Corticosteroids |
| Lisafoclox                                                                   | 1 | Immunomodulator(s) +/- Corticosteroids |

|                                                                                                             |   |                                                          |
|-------------------------------------------------------------------------------------------------------------|---|----------------------------------------------------------|
| Thalidomide                                                                                                 | 1 | Immunomodulator(s) +/-<br>Corticosteroids                |
| Corticosteroid+Rituximab+Siltuximab                                                                         | 7 | Anti-IL6 + Rituximab +/- Other                           |
| Corticosteroid+Rituximab+Tocilizumab                                                                        | 3 | Anti-IL6 + Rituximab +/- Other                           |
| Corticosteroid+Rituximab+Sirolimus+Tocilizumab                                                              | 2 | Anti-IL6 + Rituximab +/- Other                           |
| Corticosteroid+Immunoglobulin human<br>normal+Rituximab+Siltuximab                                          | 1 | Anti-IL6 + Rituximab +/- Other                           |
| Corticosteroid+Immunoglobulin human<br>normal+Rituximab+Tocilizumab                                         | 1 | Anti-IL6 + Rituximab +/- Other                           |
| Rituximab+Siltuximab                                                                                        | 1 | Anti-IL6 + Rituximab +/- Other                           |
| Rituximab+Siltuximab+Sirolimus                                                                              | 1 | Anti-IL6 + Rituximab +/- Other                           |
| Corticosteroid+Immunoglobulin human<br>normal+Tocilizumab                                                   | 2 | Anti-IL6 + Immunomodulator(s)<br>+/- Corticosteroids     |
| Corticosteroid+Siltuximab+Sirolimus                                                                         | 2 | Anti-IL6 + Immunomodulator(s)<br>+/- Corticosteroids     |
| Siltuximab+Sirolimus                                                                                        | 2 | Anti-IL6 + Immunomodulator(s)<br>+/- Corticosteroids     |
| Adalimumab+Siltuximab                                                                                       | 1 | Anti-IL6 + Immunomodulator(s)<br>+/- Corticosteroids     |
| Anakinra+Ciclosporin+Corticosteroid+<br>Immunoglobulin human<br>normal+Lenalidomide+Siltuximab+Upadacitinib | 1 | Anti-IL6 + Immunomodulator(s)<br>+/- Corticosteroids     |
| Ciclosporin+Corticosteroid+Immunoglobulin<br>human normal+Tocilizumab                                       | 1 | Anti-IL6 + Immunomodulator(s)<br>+/- Corticosteroids     |
| Corticosteroid+Eculizumab+Immunoglobulin<br>human normal+Rituximab+Siltuximab+Sirolimus                     | 1 | Anti-IL6 + Immunomodulator(s)<br>+/- Corticosteroids     |
| Corticosteroid+Eculizumab+Immunoglobulin<br>human normal+Siltuximab                                         | 1 | Anti-IL6 + Immunomodulator(s)<br>+/- Corticosteroids     |
| Corticosteroid+Eculizumab+Siltuximab                                                                        | 1 | Anti-IL6 + Immunomodulator(s)<br>+/- Corticosteroids     |
| Corticosteroid+Hydroxychloroquine<br>phosphate+Siltuximab                                                   | 1 | Anti-IL6 + Immunomodulator(s)<br>+/- Corticosteroids     |
| Corticosteroid+Hydroxychloroquine<br>phosphate+Tocilizumab                                                  | 1 | Anti-IL6 + Immunomodulator(s)<br>+/- Corticosteroids     |
| Corticosteroid+Immunoglobulin human<br>normal+Siltuximab                                                    | 1 | Anti-IL6 + Immunomodulator(s)<br>+/- Corticosteroids     |
| Corticosteroid+Ravulizumab+Siltuximab                                                                       | 1 | Anti-IL6 + Immunomodulator(s)<br>+/- Corticosteroids     |
| Corticosteroid+Excision of thymus+Siltuximab                                                                | 1 | Anti-IL6 + Procedure +/-<br>Corticosteroids              |
| Radiation therapy+Siltuximab                                                                                | 1 | Anti-IL6 + Procedure +/-<br>Corticosteroids              |
| Siltuximab+Splenectomy                                                                                      | 1 | Anti-IL6 + Procedure +/-<br>Corticosteroids              |
| Corticosteroid+Immunoglobulin human<br>normal+Rituximab                                                     | 4 | Rituximab +<br>Immunomodulator(s) +/-<br>Corticosteroids |
| Corticosteroid+Hydroxychloroquine<br>phosphate+Rituximab                                                    | 2 | Rituximab +<br>Immunomodulator(s) +/-<br>Corticosteroids |
| Corticosteroid+Rituximab+Sirolimus                                                                          | 2 | Rituximab +<br>Immunomodulator(s) +/-<br>Corticosteroids |

|                                                                                   |   |                                                          |
|-----------------------------------------------------------------------------------|---|----------------------------------------------------------|
| Celecoxib+Corticosteroid+Rituximab                                                | 1 | Rituximab +<br>Immunomodulator(s) +/-<br>Corticosteroids |
| Corticosteroid+Methotrexate+Rituximab                                             | 1 | Rituximab +<br>Immunomodulator(s) +/-<br>Corticosteroids |
| Corticosteroid+Plasmapheresis/plasma exchange                                     | 2 | Other procedure +/- drug<br>therapy                      |
| Celecoxib+Corticosteroid+Plasmapheresis/<br>plasma exchange+Rituximab+Splenectomy | 1 | Other procedure +/- drug<br>therapy                      |
| Corticosteroid+Immunoglobulin human<br>normal+Plasmapheresis/plasma exchange      | 1 | Other procedure +/- drug<br>therapy                      |
| Radiation therapy+Rituximab                                                       | 1 | Other procedure +/- drug<br>therapy                      |
| Plasmapheresis/plasma exchange                                                    | 4 | Other procedure                                          |
| Excision of thymus                                                                | 1 | Other procedure                                          |
| Radiation therapy                                                                 | 1 | Other procedure                                          |
| Splenectomy                                                                       | 1 | Other procedure                                          |
| No medical treatment                                                              | 2 | No medical treatment                                     |



Supplementary Table 4. Regimens administered to 102 iMCD patients

|                                                  | <b>Patients ever received, N (%)</b> | <b>Frequency of administration, N (%)</b> |
|--------------------------------------------------|--------------------------------------|-------------------------------------------|
| Corticosteroids                                  | 45 (44.1)                            | 51 (16.8)                                 |
| Siltuximab ± Corticosteroids                     | 51 (50.0)                            | 58 (19.1)                                 |
| Tocilizumab ± Corticosteroids                    | 20 (19.6)                            | 23 (7.6)                                  |
| Rituximab ± Corticosteroids                      | 29 (28.4)                            | 33 (10.9)                                 |
| Chemotherapy-based regimen                       | 31 (30.4)                            | 49 (16.2)                                 |
| Immunomodulator ± Corticosteroids                | 23 (22.5)                            | 31 (10.2)                                 |
| Anti-IL6 + Rituximab ± Other                     | 13 (12.7)                            | 16 (5.3)                                  |
| Anti-IL6 + Immunomodulator(s) ± Steroids         | 13 (12.7)                            | 16 (5.3)                                  |
| Anti-IL6 + Procedure ± Corticosteroids           | 2 (2.0)                              | 3 (1.0)                                   |
| Rituximab + Immunomodulator(s) ± Corticosteroids | 9 (8.8)                              | 10 (3.3)                                  |
| Procedure + drug therapy                         | 4 (3.9)                              | 5 (1.7)                                   |
| Procedure                                        | 6 (5.9)                              | 7 (2.3)                                   |
| No medical treatment*                            | 2 (2.0)                              | 2 (0.7)                                   |
|                                                  | <b>Total patients: 102</b>           | <b>Total regimens administered: 304</b>   |

\*No medical treatment beyond diagnostic lymph node excision

Supplementary Table 5. Chemotherapy regimens listed by patient and response status

| <b>Patient ID</b> | <b>Response ever achieved by patient</b> | <b>Regimen</b>                                                                                                                                 | <b>Regimen response</b> |
|-------------------|------------------------------------------|------------------------------------------------------------------------------------------------------------------------------------------------|-------------------------|
| R1                | Yes                                      | Bortezomib + Corticosteroid + Thalidomide + Tocilizumab                                                                                        | R                       |
| R1                | Yes                                      | Bendamustine + Corticosteroid + Rituximab                                                                                                      | NR                      |
| R2                | Yes                                      | Ciclosporin + Corticosteroid + Cyclophosphamide + Etoposide + Rituximab + Tocilizumab                                                          | R                       |
| R3                | Yes                                      | Bortezomib + Corticosteroid + Cyclophosphamide + Doxorubicin + Etoposide + Immunoglobulin human normal + Rituximab + Siltuximab + Thalidomide  | R                       |
| R3                | Yes                                      | Bortezomib + Corticosteroid + Cyclophosphamide + Doxorubicin + Etoposide + Rituximab + Siltuximab + Thalidomide + Tocilizumab                  | NR                      |
| R3                | Yes                                      | Bortezomib + Celecoxib + Corticosteroid + Siltuximab + Thalidomide                                                                             | NR                      |
| R3                | Yes                                      | Bortezomib + Ciclosporin + Corticosteroid + Immunoglobulin human normal + Siltuximab + Thalidomide                                             | NR                      |
| R3                | Yes                                      | Bortezomib + Ciclosporin + Corticosteroid + Cyclophosphamide + Doxorubicin + Etoposide + Immunoglobulin human normal + Rituximab + Thalidomide | NR                      |
| R4                | Yes                                      | Corticosteroid + Cyclophosphamide + Etoposide + Rituximab + Tocilizumab                                                                        | R                       |
| R5                | Yes                                      | Corticosteroid + Cyclophosphamide + Etoposide + Rituximab + Vincristine                                                                        | R                       |
| R6                | Yes                                      | Corticosteroid + Cyclophosphamide + Etoposide + Rituximab                                                                                      | R                       |
| R6                | Yes                                      | Corticosteroid + Cyclophosphamide + Rituximab                                                                                                  | R                       |
| R7                | Yes                                      | Bortezomib + Cisplatin + Corticosteroid + Cyclophosphamide + Doxorubicin + Etoposide + Rituximab + Thalidomide + Tocilizumab                   | R                       |
| R8                | Yes                                      | Corticosteroid + Cyclophosphamide + Doxorubicin + Immunoglobulin human normal + Rituximab + Vincristine                                        | R                       |
| R9                | Yes                                      | Corticosteroid + Etoposide + Immunoglobulin human normal + Rituximab                                                                           | R                       |
| R9                | Yes                                      | Corticosteroid + Etoposide + Immunoglobulin human normal + Rituximab                                                                           | R                       |
| R10               | Yes                                      | Corticosteroid + Cyclophosphamide + Doxorubicin + Hydroxychloroquine phosphate + Vincristine                                                   | R                       |
| R11               | Yes                                      | Corticosteroid + Cyclophosphamide + Eculizumab + Immunoglobulin human normal + Rituximab + Siltuximab                                          | R                       |
| R11               | Yes                                      | Anakinra + Corticosteroid + Etoposide                                                                                                          | NR                      |
| R11               | Yes                                      | Anakinra + Corticosteroid + Eculizumab + Etoposide + Immunoglobulin human normal + Methotrexate                                                | NR                      |
| R12               | Yes                                      | Cyclophosphamide + Etoposide + Immunoglobulin human normal + Rituximab + Ruxolitinib                                                           | R                       |
| R12               | Yes                                      | Cyclophosphamide + Etoposide + Rituximab + Sirolimus                                                                                           | NR                      |
| R12               | Yes                                      | Corticosteroid + Cyclophosphamide + Doxorubicin + Etoposide + Immunoglobulin human normal + Rituximab + Vincristine                            | NR                      |
| R13               | Yes                                      | Bortezomib + Corticosteroid + Rituximab                                                                                                        | R                       |

|      |    |                                                                                                                                                                                  |    |
|------|----|----------------------------------------------------------------------------------------------------------------------------------------------------------------------------------|----|
| NR1  | No | Corticosteroid + Etoposide + Rituximab                                                                                                                                           | NR |
| NR2  | No | Corticosteroid + Cyclophosphamide + Doxorubicin + Rituximab + Vincristine                                                                                                        | NR |
| NR3  | No | Bleomycin + Corticosteroid + Dacarbazine + Doxorubicin + Vinblastine                                                                                                             | NR |
| NR4  | No | Ciclosporin + Corticosteroid + Cyclophosphamide + Doxorubicin + Immunoglobulin human normal + Plasmapheresis/plasma exchange + Rituximab + Sirolimus + Tocilizumab + Vincristine | NR |
| NR5  | No | Bortezomib + Cisplatin + Corticosteroid + Cyclophosphamide + Daratumumab + Doxorubicin + Etoposide + Rituximab + Sirolimus + Thalidomide                                         | NR |
| NR6  | No | Corticosteroid + Cyclophosphamide + Doxorubicin + Rituximab + Vincristine                                                                                                        | NR |
| NR7  | No | Corticosteroid + Decitabine + Siltuximab                                                                                                                                         | NR |
| NR7  | No | Decitabine + Rituximab                                                                                                                                                           | NR |
| NR8  | No | Corticosteroid + Etoposide                                                                                                                                                       | NR |
| NR8  | No | Corticosteroid + Cyclophosphamide + Doxorubicin + Rituximab + Vincristine                                                                                                        | NR |
| NR9  | No | Corticosteroid + Cyclophosphamide + Doxorubicin + Rituximab + Sirolimus + Tocilizumab + Vincristine                                                                              | NR |
| NR9  | No | Bortezomib + Corticosteroid + Cyclophosphamide + Doxorubicin + Etoposide + Rituximab + Sirolimus                                                                                 | NR |
| NR10 | No | Bortezomib + Corticosteroid + Cyclophosphamide + Rituximab + Tocilizumab                                                                                                         | NR |
| NR11 | No | Corticosteroid + Etoposide + Immunoglobulin human normal + Sirolimus + Tocilizumab                                                                                               | NR |
| NR11 | No | Baricitinib + Bortezomib + Ciclosporin + Corticosteroid + Cyclophosphamide + Immunoglobulin human normal + Rituximab + Siltuximab + Sirolimus                                    | NR |
| NR12 | No | Corticosteroid + Cyclophosphamide + Doxorubicin + Rituximab + Siltuximab + Vincristine                                                                                           | NR |

Supplementary Table 6. Chemotherapy agents stratified by inclusion in response-achieving regimens

| <b>Contains</b>  | <b>Regimens achieved response</b> | <b>Regimens did not achieve response</b> |
|------------------|-----------------------------------|------------------------------------------|
| Bortezomib       | 4/15 (27)                         | 8/25 (32)                                |
| Cyclophosphamide | 11/15 (73)                        | 14/25 (56)                               |
| Etoposide        | 9/15 (60)                         | 11/25 (44)                               |
| Doxorubicin      | 4/15 (27)                         | 12/25 (48)                               |
| Vincristine      | 3/15 (20)                         | 7/25 (28)                                |
| Cisplatin        | 1/15 (7)                          | 1/25 (4)                                 |
| Bendamustine     | 0                                 | 1/25 (4)                                 |
| Bleomycin        | 0                                 | 1/25 (4)                                 |
| Dacarbazine      | 0                                 | 1/25 (4)                                 |
| Vinblastine      | 0                                 | 1/25 (4)                                 |
| Decitabine       | 0                                 | 2/25 (8)                                 |
| Methotrexate     | 0                                 | 1/25 (4)                                 |

Supplementary Table 7. Lymph node and symptomatic response

|                                                  | Patients ever achieved a response* |           | N patients with evaluable regimen |
|--------------------------------------------------|------------------------------------|-----------|-----------------------------------|
|                                                  | Yes, N (%)                         | No, N (%) |                                   |
| Anti-IL6 ± Corticosteroids†                      | 25 (52.1)                          | 23 (47.9) | 48                                |
| Siltuximab ± Corticosteroids                     | 19 (52.8)                          | 17 (47.2) | 36                                |
| Tocilizumab ± Corticosteroids                    | 7 (46.7)                           | 8 (53.3)  | 15                                |
| Rituximab ± Corticosteroids                      | 8 (36.4)                           | 14 (63.6) | 22                                |
| Chemotherapy-based regimen                       | 13 (52.0)                          | 12 (48.0) | 25                                |
| Immunomodulator ± Corticosteroids                | 4 (26.7)                           | 11 (73.3) | 15                                |
| Anti-IL6 + Rituximab ± Other                     | 3 (60.0)                           | 2 (40.0)  | 5                                 |
| Anti-IL6 + Immunomodulator(s) ± Steroids         | 1 (20.0)                           | 4 (80.0)  | 5                                 |
| Anti-IL6 + Procedure ± Corticosteroids           | 0                                  | 0         | 0                                 |
| Rituximab + Immunomodulator(s) ± Corticosteroids | 0                                  | 5 (100)   | 5                                 |
| Corticosteroids                                  | 1 (4.5)                            | 21 (95.5) | 22                                |
| Procedure + drug therapy                         | 1 (33.3)                           | 2 (66.7)  | 3                                 |
| Procedure                                        | 0                                  | 1 (100)   | 1                                 |
| No Medical Treatment                             | 0                                  | 2 (100)   | 2                                 |

\*For patients who >1 instance of the same regimen category, they are considered to have achieved response if response was achieved at least one time.

†Includes patients ever treated with either Siltuximab ± Corticosteroids and/or Tocilizumab ± Corticosteroids. Best response among those regimens is included; therefore, the N evaluable for each Siltuximab ± Corticosteroids and Tocilizumab ± Corticosteroids may not sum to the N evaluable for Anti-IL6 ± Corticosteroids

Supplementary Figure 1. Study consort diagram

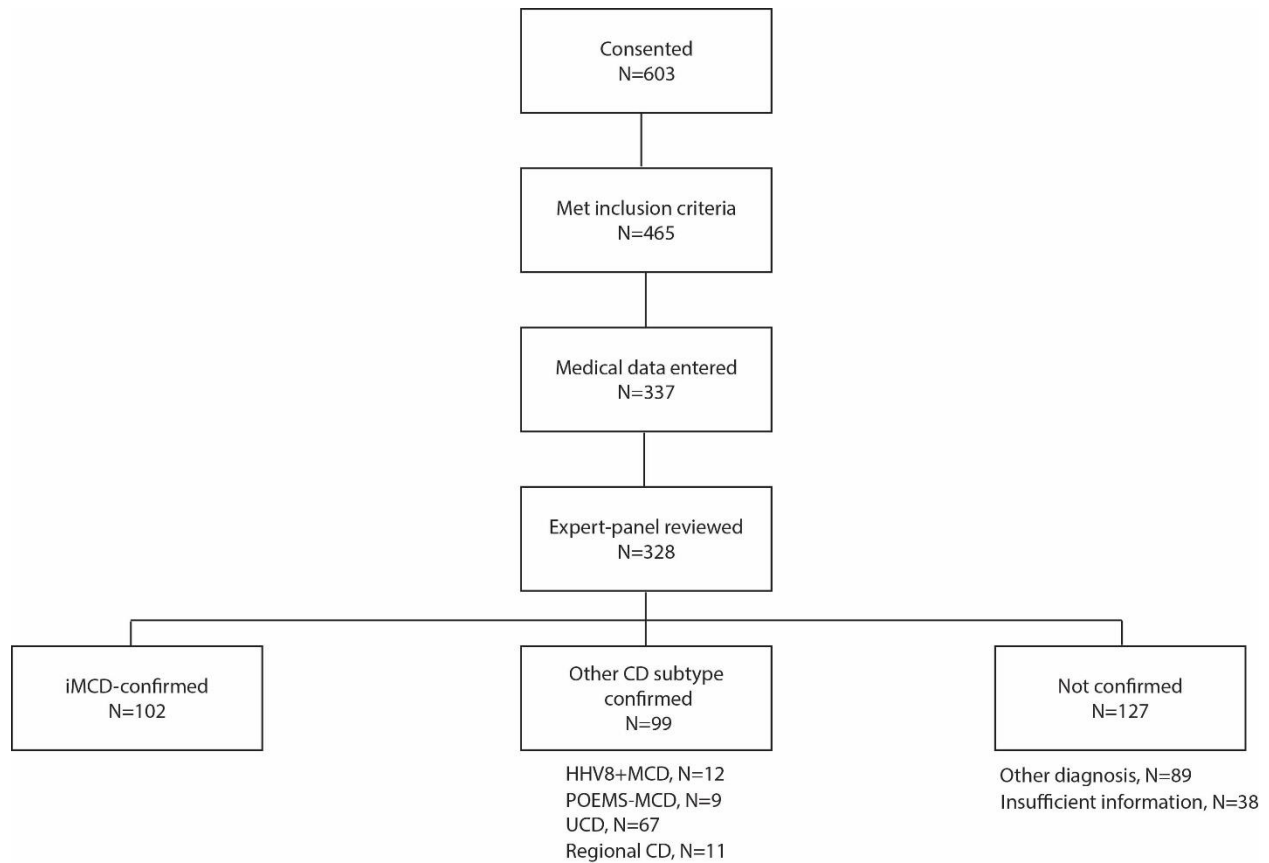

Study flow diagram demonstrating the number of patients who enrolled through the study and were eligible for analysis. There were 102 iMCD patients who enrolled, met inclusion criteria, underwent expert panel review, and met criteria for iMCD. Of the other 328 patients reviewed by the expert panel, 99 were determined to be another Castleman disease (CD) subtype, and 127 were not confirmed to have CD due to insufficient information or information that suggested another disease process. Of these 127 patients, 37 (29.1%) were excluded due to insufficient information. This may include patients for whom a hematoxylin and eosin stained lymph node slide could not be obtained or for whom clinical diagnostic data could not be obtained (i.e., records and/or lymph node tissue were past retention dates). The remaining 89 (70.1%) patients were determined to be inconsistent with a CD diagnosis either because of an inconsistent pathologic diagnosis, an inconsistent clinical and pathologic diagnosis, or for whom

another autoimmune, infectious, or neoplastic disorder was strongly suspected. Of note, these 127 patients that were not confirmed represent patients who were suspected to have all subtypes of CD and are not limited to patients suspected to have iMCD. Abbreviations: HHV8+MCD: human herpes virus 8-associated multicentric CD; POEMS-MCD: polyneuropathy, organomegaly, endocrinopathy, monoclonal gammopathy, skin changes multicentric CD; UCD: unicentric CD.

Supplementary Figure 2. Regimen administration and response assessment among regimens identified as immunomodulator(s) ± corticosteroids

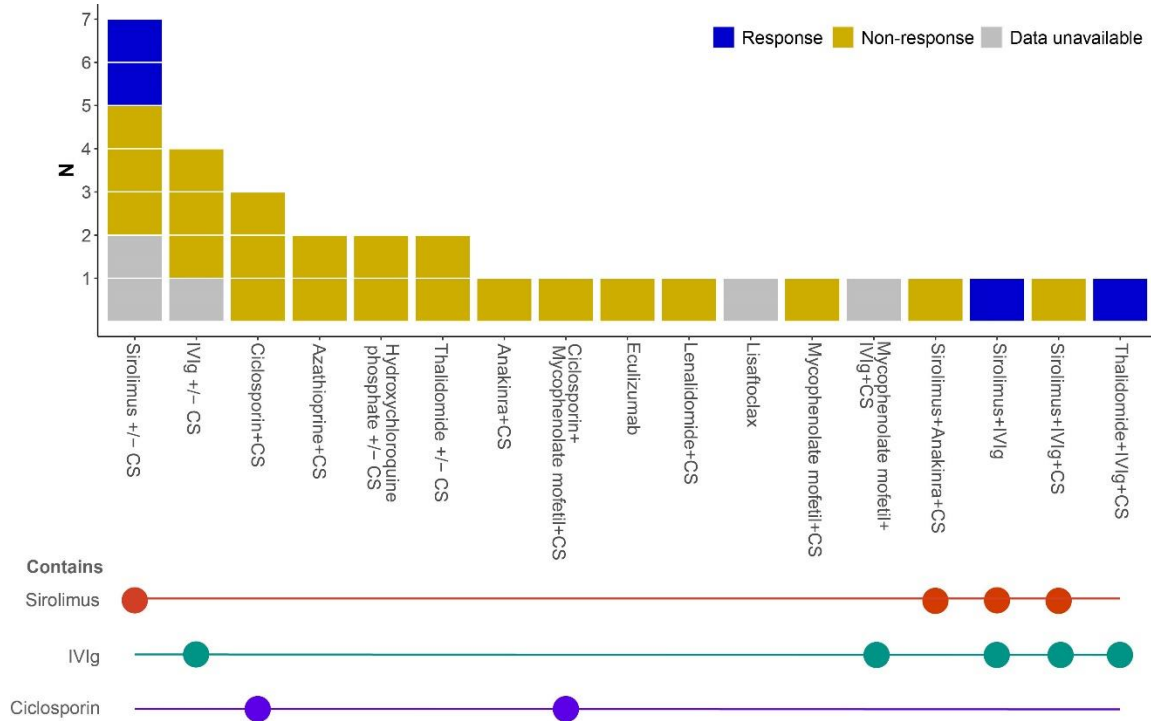

Visual depiction of regimens identified as immunomodulator(s) ± corticosteroids. Among the immunomodulator regimens, we found 17 unique combinations, the most frequent of which was sirolimus ± corticosteroids (n=7). Across all immunomodulator ± corticosteroid regimens, we observed a relatively low response. Four (19%) patients with an evaluable regimen achieved at least one response. Shaded circles indicate if a regimen contains the three most frequently found immunomodulators: sirolimus (red), intravenous immunoglobulins (IVIg) (teal), or cyclosporin (purple). Abbreviations: CS: corticosteroids



Supplementary Figure 3. Best response stratified by clinical subtype

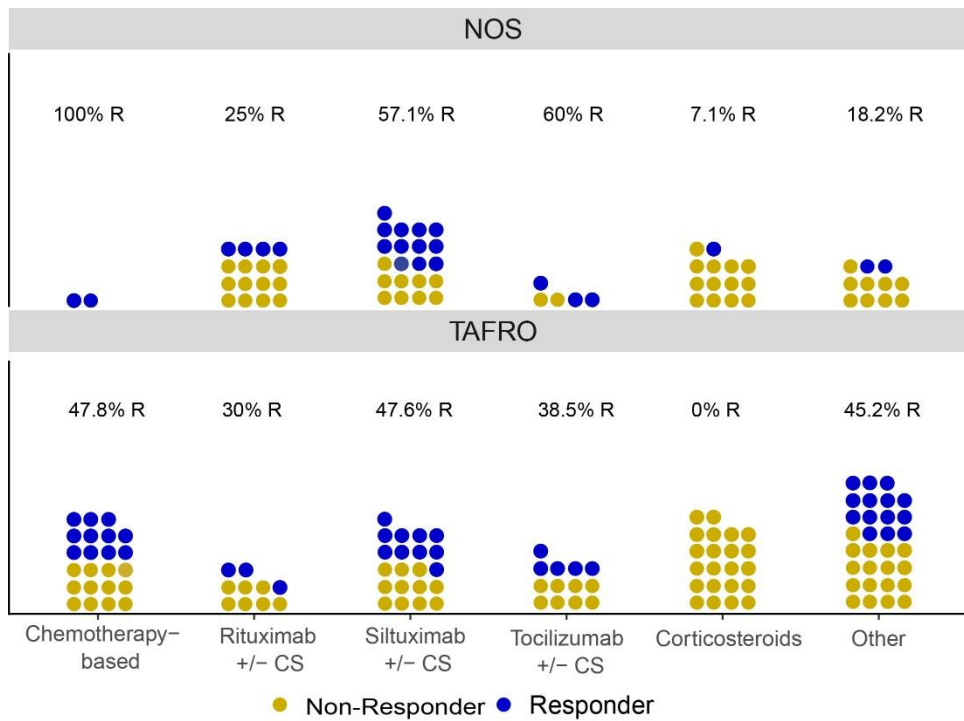

Response proportions by NOS and TAFRO subtype were similar to those observed in mild/moderate and severe disease. Of note, the majority of chemotherapy-based regimens were administered to TAFRO patients which resulted in a 47.8% response. Abbreviations: CS: corticosteroids
